# Supplementary material for: High genetic similarity of ciprofloxacin-resistant Campylobacter jejuni in central Europe
Source: Front Microbiol. 2015 Oct 23;6:1169. doi: 10.3389/fmicb.2015.01169 (PMC4615952; doi:10.3389/fmicb.2015.01169)
Supplement: TABLE S1 — Isolates used in this study. The source of isolates, their antibiotic resistance profiles, MLST types and gyrA QRDR types. [file Table_1.XLSX]

## Sheet: Data
	Strain	Source	Country	Year	gyrA type	MLST ST	MLST CC	Novel allele or ST	Chloramphenicol		Ciprofloxacin		Nalidixic acid		Erythromycin		Gentamicin		Streptomycin		Tetracycline		MDR	GenBank accession number	PubMLST ID
									Resistance	MIC [mg/L]	Resistance	MIC [mg/L]	Resistance	MIC [mg/L]	Resistance	MIC [mg/L]	Resistance	MIC [mg/L]	Resistance	MIC [mg/L]	Resistance	MIC [mg/L]
1	BfR-CA-06466	zoo animals	Germany	2008	13	583	ST-45 complex		S	<=2	R	>=4	R	64	S	1	S	0.25	S	<=1	S	<=0.25	1	KP794692	34193		Legend
2	57359	turkey meat	Slovenia	2010	1	104	ST-21 complex		S	<=2	R	>=4	R	>=64	S	<=0.5	S	0.5	S	<=1	S	<=0.25	1	KP794646	29938		S = sensitive (determined based on the breakpoints recommended by EFSA)
3	1271/08	turkey faeces	Slovenia	2008	1	822	ST-21 complex		S	<=2	R	>=4	R	>=64	S	<=0.5	S	0.25	S	<=1	S	<=0.25	1	KP794635	29919		R = resistant (determined based on the breakpoints recommended by EFSA)
4	244/08	turkey faeces	Slovenia	2008	1	104	ST-21 complex		S	<=2	R	>=4	R	>=64	S	<=0.5	S	0.25	S	<=1	S	<=0.25	1	KP794643	29933		ND = not determined
5	BfR-CA-11574	strawberry	Germany	2013	1	464	ST-464 complex		S	<=2	R	>=4	R	32	S	1	S	0.25	S	<=1	R	>=16	2	KP794718	34194		MDR = number of antibiotic classes the strain is resistant to
6	01/302/12z	human	Slovenia	2012	13	5205	ST-353 complex		S	<=2	R	>=4	R	>=64	S	<=0.5	S	0.25	S	<=1	S	0.5	1	KP794675	31823		UK = unknown
7	01/711/11c	human	Slovenia	2011	13	51	ST-443 complex		S	<=2	R	>=4	R	>=64	S	<=0.5	S	0.25	S	<=1	S	<=0.25	1	KP794679	31811
8	02/109/12c	human	Slovenia	2012	13	2100	ST-52 complex		S	<=2	R	>=4	R	>=64	S	<=0.5	S	0.25	S	<=1	S	0.5	1	KP794678	29407
9	02/13/10c	human	Slovenia	2010	13	5205	ST-353 complex		S	16	R	>=4	R	>=64	S	<=0.5	S	0.25	S	<=1	S	1	1	KP794684	29409
10	02/16/09c	human	Slovenia	2009	13	354	ST-354 complex		S	<=2	R	>=4	R	>=64	S	<=0.5	S	0.25	S	<=1	S	0.5	1	KP794685	31817
11	MRC-11/00041	human	Austria	2011	13	2274	UA		S	<=2	R	>=4	R	>=64	ND	ND	ND	ND	S	<=1	R	>=16	ND	KP794777	31643
12	02/195/12c	human	Slovenia	2012	13	5205	ST-353 complex		S	<=2	R	>=4	R	>=64	S	<=0.5	S	0.25	S	<=1	S	0.5	1	KP794676	31824
13	02/77/11c	human	Slovenia	2011	13	572	ST-206 complex		S	<=2	R	>=4	R	>=64	S	<=0.5	S	0.25	S	<=1	S	<=0.25	1	KP794680	31820
14	02/84/10c	human	Slovenia	2010	1	362	ST-362 complex		S	<=2	R	>=4	R	>=64	S	<=0.5	S	0.5	S	2	S	0.5	1	KP794682	31818
15	375/06	human	Slovenia	2006	1	104	ST-21 complex		S	<=2	R	>=4	R	>= 64	S	<=0.5	S	0.5	S	<=1	S	0.5	1	KP794689	31815
16	573/03	human	Slovenia	2003	1	104	ST-21 complex		S	<=2	R	>=4	R	>= 64	S	<=0.5	S	0.25	S	<=1	S	<=0.25	1	KP794690	34195
17	654/08	human	Slovenia	2008	13	3327	ST-353 complex		S	<=2	R	>=4	R	>=64	S	<=0.5	S	<=0.12	S	2	S	0.5	1	KP794686	31822
18	02/159/08	human	Slovenia	2008	1	822	ST-21 complex		ND	ND	R	>=4	R	>=64	S	<=0.5	S	0.25	S	<=1	S	<=0.25	ND	KP794802	31793
19	9091	human	Slovenia	2009	13	5205	ST-353 complex		S	4	R	>=4	R	>=64	S	<=0.5	S	0.5	S	2	S	1	1	KP794655	29952
20	02/167/12	human	Slovenia	2012	13	122	ST-206 complex		ND	ND	R	>=4	R	>=64	S	<=0.5	S	0.25	S	<=1	S	<=0.25	ND	KP794803	31789
21	02/178/12	human	Slovenia	2012	13	5205	ST-353 complex		ND	ND	R	>=4	R	>=64	S	<=0.5	S	0.5	S	1	S	<=0.25	ND	KP794804	31805
22	9152	human	Slovenia	2009	3	4899	ST-354 complex		S	<=2	R	>=4	R	>=64	S	<=0.5	S	0.5	S	<=1	S	0.5	1	KP794656	29953
23	9387	human	Slovenia	2009	1	50	ST-21 complex		S	<=2	R	>=4	R	>=64	S	<=0.5	S	0.25	S	<=1	S	<=0.25	1	KP794657	29954
24	02/56/08	human	Slovenia	2008	1	104	ST-21 complex		ND	ND	R	>=4	R	>=64	S	<=0.5	S	0.5	S	1	S	<=0.25	ND	KP794799	31788
25	02/59/08	human	Slovenia	2008	13	305	ST-574 complex		ND	ND	R	>=4	R	>=64	S	<=0.5	S	0.5	S	1	R	>=16	ND	KP794800	31796
26	02/65/08	human	Slovenia	2008	13	257	ST-257 complex		ND	ND	R	>=4	R	>=64	S	<=0.5	S	0.5	S	1	R	>=16	ND	KP794801	31795
27	9493	human	Slovenia	2009	1	50	ST-21 complex		S	<=2	R	>=4	R	>=64	S	<=0.5	S	0.25	S	<=1	S	<=0.25	1	KP794658	29955
28	H1	human	Austria	UK	13	572	ST-206 complex		S	4	R	>=4	R	>= 64	S	<=0.5	S	<=0.12	S	<=1	S	<=0.25	1	KP794672	31627
29	H3	human	Austria	UK	13	7299	ST-464 complex		S	<=2	R	>=4	R	64	S	<=0.5	S	0.25	S	<=1	S	<=0.25	1	KP794673	29406
30	1874	human	Slovenia	2006	13	400	ST-353 complex		ND	ND	R	>=4	R	>=64	S	<=0.5	S	1	R	>=16	R	>=16	ND	KP794798	31802
31	9795	human	Slovenia	2009	13	5205	ST-353 complex		S	4	R	>=4	R	>=64	S	<=0.5	S	0.25	S	1	S	1	1	KP794661	29960
32	MRC-09/00021	human	Austria	2009	1	50	ST-21 complex		S	<=2	R	>=4	R	64	S	<=0.5	S	0.25	S	<=1	R	2	2	KP794747	31636
33	416	human	Slovenia	2006	1	50	ST-21 complex		ND	ND	R	>=4	R	>=64	S	<=0.5	S	1	S	1	S	<=0.25	ND	KP794796	31791
34	9829	human	Slovenia	2009	13	5205	ST-353 complex		S	4	R	>=4	R	>=64	S	<=0.5	S	0.25	S	<=1	S	1	1	KP794662	29961
35	816	environmental water	Slovenia	2008	1	657	ST-658 complex		S	<=2	R	>=4	R	>=64	S	<=0.5	S	0.5	S	2	S	0.5	1	KP794652	29947
36	BfR-CA-06325	dog faeces	Germany	2008	10	3478	ST-21 complex		S	4	R	2	R	32	S	1	S	0.5	S	<=1	S	1	1	KP794691	34196
37	BfR-CA-09345	chicken skin	Germany	2011	1	50	ST-21 complex		S	<=2.0	R	>=4	R	>=64	S	1	S	0.5	S	2	S	<=0.25	1	KP794701	31674
38	690	human	Slovenia	2006	1	53	ST-21 complex		ND	ND	R	>=4	R	>=64	S	<=0.5	S	1	S	1	S	<=0.25	ND	KP794797	31786
39	BfR-CA-11551	chicken skin	Germany	2013	13	824	ST-257 complex		S	<=2	R	>=4	R	64	S	<=0.5	S	0.25	S	<=1	S	<=0.25	1	KP794717	31671
40	BfR-CA-07126	chicken meat	Germany	2009	12	353	ST-353 complex		S	<=2	R	>=4	R	32	S	<=0.5	S	<=0.12	S	<=1	S	<=0.25	1	KP794694	31687
41	130	chicken meat	Slovenia	2001	13	2036	ST-353 complex		S	<=2	R	>=4	R	>=64	S	<=0.5	S	0.25	S	<=1	S	<=0.25	1	KP794636	29923
42	BfR-CA-07349	chicken meat	Germany	2009	4	583	ST-45 complex		S	<=2	R	>=4	R	64	S	1	S	0.5	S	<=1	S	<=0.25	1	KP794695	31686
43	BfR-CA-07401	chicken meat	Germany	2009	1	19	ST-21 complex		S	<=2	R	>=4	R	>=64	S	<=0.5	S	1	S	2	S	<=0.25	1	KP794696	31680
44	53191	chicken meat	Slovenia	2009	13	475	ST-48 complex		S	<=2	R	>=4	R	>=64	S	<=0.5	S	0.5	S	2	S	<=0.25	1	KP794687	31717
45	53196	chicken meat	Slovenia	2009	13	475	ST-48 complex		S	<=2	R	>=4	R	>=64	S	<=0.5	S	0.5	S	2	S	<=0.25	1	KP794645	29936
46	BfR-CA-09386	chicken meat	Germany	2011	13	7515	ST-42 complex	uncA 458, ST 7515	S	<=2.0	R	4	R	>=64	S	4	S	<=0.12	S	<=1	S	0.5	1	KP794702	32368
47	BfR-CA-11461	chicken meat	Germany	2013	1	1949	ST-21 complex		S	<=2	R	>=4	R	32	S	1	S	0.25	S	<=1	S	<=0.25	1	KP794716	31679
48	H7	human	Austria	UK	7	22	ST-22 complex		S	<=2	R	>=4	R	>=64	S	<=0.5	ND	ND	ND	ND	R	>=16	ND	KP794674	31628
49	IVZ11	chicken meat	Slovenia	2013	13	881	UA		S	<=2	R	2	R	32	S	<=0.5	S	<=0.12	S	<=1	S	<=0.25	1	KP794723	31720
50	IVZ12	chicken meat	Slovenia	2013	13	2066	ST-52 complex		S	≤ 2	R	>= 4	R	>= 64	S	<=0.5	S	0.25	S	<=1	S	<=0.25	1	KP794724	31749
51	IVZ126	chicken meat	Slovenia	2013	3	4899	ST-354 complex		S	≤ 2	R	>= 4	R	>= 64	S	<=0.5	S	0.25	S	<=1	S	<=0.25	1	KP794727	31716
52	IVZ128c	chicken meat	Slovenia	2013	1	19	ST-21 complex		S	<=2	R	>= 4	R	>= 64	S	<=0.5	S	0.5	S	<=1	S	<=0.25	1	KP794728	31726
53	IVZ129	chicken meat	Slovenia	2013	13	881	UA		S	≤ 2	R	>= 4	R	>= 64	S	<=0.5	S	0.25	S	<=1	S	<=0.25	1	KP794729	31722
54	IVZ131	chicken meat	Slovenia	2013	13	2066	ST-52 complex		S	≤ 2	R	>= 4	R	64	S	<=0.5	S	0.25	S	<=1	S	<=0.25	1	KP794730	31750
55	IVZ1372	chicken meat	Slovenia	2012	13	5205	ST-353 complex		S	≤ 2	R	4	R	>= 64	S	<=0.5	S	0.5	S	<=1	S	<=0.25	1	KP794741	31739
56	IVZ1373	chicken meat	Slovenia	2012	7	22	ST-22 complex		S	≤ 2	R	>= 4	R	>= 64	S	<=0.5	S	1	S	2	S	<=0.25	1	KP794742	31747
57	IVZ1412	chicken meat	Slovenia	2012	13	5205	ST-353 complex		S	<=2	R	>= 4	R	32	S	<=0.5	S	0.5	S	<=1	S	<=0.25	1	KP794743	31740
58	IVZ1414	chicken meat	Slovenia	2012	1	1900	ST-658 complex		S	≤ 2	R	4	R	>= 64	S	<=0.5	S	0.25	S	<=1	S	<=0.25	1	KP794744	31744
59	IVZ1541	chicken meat	Slovenia	2012	13	2863	ST-354 complex		S	<=2	R	>= 4	S	4	S	<=0.5	S	0.5	S	2	S	1	1	KP794745	31712
60	IVZ162	chicken meat	Slovenia	2013	13	824	ST-257 complex		S	≤ 2	R	>= 4	R	>= 64	S	<=0.5	S	0.5	S	<=1	S	<=0.25	1	KP794731	31710
61	IVZ276	chicken meat	Slovenia	2013	13	5205	ST-353 complex		S	≤ 2	R	>= 4	R	>= 64	S	<=0.5	S	0.5	S	<=1	S	<=0.25	1	KP794732	31736
62	IVZ280	chicken meat	Slovenia	2013	13	881	UA		S	4	R	>= 4	R	>= 64	S	<=0.5	S	0.5	S	<=1	S	<=0.25	1	KP794733	31723
63	IVZ282	chicken meat	Slovenia	2013	13	881	UA		S	≤ 2	R	>= 4	R	>= 64	S	<=0.5	S	0.5	S	<=1	S	<=0.25	1	KP794734	31724
64	IVZ47	chicken meat	Slovenia	2013	13	881	UA		S	≤ 2	R	4	R	>= 64	S	<=0.5	S	0.25	S	<=1	S	<=0.25	1	KP794725	31721
65	IVZ48	chicken meat	Slovenia	2013	13	2854	ST-45 complex		S	≤ 2	R	>= 4	R	>= 64	S	<=0.5	S	0.25	S	<=1	S	<=0.25	1	KP794726	31734
66	IVZ539	chicken meat	Slovenia	2013	13	881	UA		S	4	R	>= 4	R	>= 64	S	<=0.5	S	0.5	S	<=1	S	<=0.25	1	KP794735	31725
67	IVZ8	chicken meat	Slovenia	2013	13	2066	ST-52 complex		S	≤ 2	R	4	R	64	S	<=0.5	S	0.25	S	<=1	S	<=0.25	1	KP794721	31748
68	IVZ806	chicken meat	Slovenia	2013	13	572	ST-206 complex		S	<=2	R	>= 4	R	32	S	<=0.5	S	0.5	S	2	S	<=0.25	1	KP794736	31718
69	IVZ808	chicken meat	Slovenia	2013	13	5205	ST-353 complex		S	<=2	R	>=4	S	8	S	<=0.5	S	0.5	S	<=1	S	<=0.25	1	KP794737	31737
70	IVZ809	chicken meat	Slovenia	2013	13	5205	ST-353 complex		S	<=2	R	2	S	4	S	<=0.5	S	0.25	S	<=1	S	<=0.25	1	KP794738	31738
71	IVZ9	chicken meat	Slovenia	2013	13	881	UA		S	≤ 2	R	4	R	>= 64	S	<=0.5	S	0.25	S	<=1	S	<=0.25	1	KP794722	31719
72	CFA12	chicken liver	Austria	UK	1	49	ST-49 complex		S	<=2	R	>=4	R	>= 65	S	<=0.5	S	0.5	S	<=1	S	<=0.25	1	KP794669	31626
73	1186/08	chicken faeces	Slovenia	2008	1	822	ST-21 complex		S	<=2	R	>=4	R	>=64	S	<=0.5	S	0.25	S	<=1	S	0.5	1	KP794631	29915
74	122/08	chicken faeces	Slovenia	2008	1	104	ST-21 complex		S	<=2	R	2	R	64	S	<=0.5	S	0.25	S	<=1	S	<=0.25	1	KP794633	29917
75	123/08	chicken faeces	Slovenia	2008	1	104	ST-21 complex		S	<=2	R	2	R	64	S	<=0.5	ND	ND	S	<=1	S	<=0.25	1	KP794634	29918
76	1591/08	chicken faeces	Slovenia	2008	12	4878	ST-464 complex		S	<=2	R	>=4	S	2	S	0.5	S	0.25	S	<=1	S	<=0.25	1	KP794639	29926
77	193	chicken faeces	Austria	UK	13	881	UA		S	<=2	R	4	R	>=64	S	<=0.5	S	<=0.12	S	<=1	S	<=0.25	1	KP794629	34197
78	196	chicken faeces	Austria	UK	13	824	ST-257 complex		S	<=2	R	>=4	R	>=64	S	<=0.5	S	0.25	S	<=1	S	<=0.25	1	KP794630	34198
79	216	chicken faeces	Austria	UK	13	4373	UA		S	4	R	>=4	R	>=64	S	<=0.5	S	0.25	S	<=1	S	0.5	1	KP794666	31625
80	267	chicken faeces	Austria	UK	1	7514	ST-353 complex	aspA 387, ST 7514	S	<=2	R	>=4	R	>=64	S	<=0.5	S	0.25	S	<=1	S	<=0.25	1	KP794667	32367
81	296	chicken faeces	Austria	UK	7	50	ST-21 complex		S	<=2	R	>=4	R	>=64	S	<=0.5	S	0.25	S	<=1	S	<=0.25	1	KP794668	31623
82	59	chicken faeces	Austria	UK	13	4373	UA		S	<=2	R	>=4	R	32	S	<=0.5	S	0.25	S	<=1	S	<=0.25	1	KP794628	34199
83	70	chicken faeces	Austria	UK	13	4800	UA		S	<=2	R	>=4	R	>= 64	S	<=0.5	S	0.25	S	<=1	S	<=0.25	1	KP794665	31624
84	BfR-CA-11253	chicken caecum	Germany	2013	13	572	ST-206 complex		S	4	R	>=4	R	64	S	2	S	0.25	S	<=1	S	<=0.25	1	KP794711	31668
85	BfR-CA-11192	calf faeces	Germany	2013	9	45	ST-45 complex		S	<=2	R	>=4	R	32	S	1	S	0.5	S	<=1	S	<=0.25	1	KP794710	31664
86	1728/08	bovine faeces	Slovenia	2008	1	104	ST-21 complex		S	<=2	R	>=4	R	>=64	S	<=0.5	S	0.5	S	2	S	<=0.25	1	KP794640	29928
87	180/08	bovine faeces	Slovenia	2008	10	881	UA		S	<=2	R	>=4	R	>=64	S	<=0.5	S	0.5	S	<=1	S	<=0.25	1	KP794641	29930
88	211/08	bovine faeces	Slovenia	2008	1	104	ST-21 complex		S	<=2	R	>=4	R	>=64	S	<=0.5	S	0.25	S	<=1	S	<=0.25	1	KP794642	29931
89	609/08	bovine faeces	Slovenia	2008	1	50	ST-21 complex		S	<=2	R	>=4	R	>=64	S	<=0.5	S	0.25	S	<=1	S	<=0.25	1	KP794650	29943
90	BfR-CA-10467	turkey meat	Germany	2012	6	50	ST-21 complex		S	<=2	R	>=4	R	>=64	S	<=0.5	S	0.5	S	2	R	>=16	2	KP794706	31694
91	BfR-CA-10964	turkey meat	Germany	2012	13	3327	ST-353 complex		S	<=2	R	>=4	R	32	S	<=0.5	S	0.5	S	2	R	16	2	KP794708	31695
92	BfR-CA-10387	turkey caecum	Germany	2012	13	5011	ST-353 complex		S	<=2	R	>=4	R	64	S	<=0.5	S	0.5	S	2	R	>=16	2	KP794705	31696
93	BfR-CA-11089	turkey caecum	Germany	2013	11	1301	ST-692 complex		S	<=2	R	>=4	R	64	S	<=0.5	S	0.5	S	<=1	R	>=16	2	KP794709	31697
94	MRC-11/00015	human	Austria	2011	12	7516	ST-353 complex	tkt 578, ST 7516	S	<=2	R	4	R	32	S	<=0.5	S	<=0.12	S	<=1	R	>=16	2	KP794775	32369
95	01/427/11z	human	Slovenia	2011	13	7301	ST-353 complex		S	<=2	R	>=4	R	>=64	S	<=0.5	S	<=0.12	S	<=1	R	2	2	KP794681	29408
96	02/154/12c	human	Slovenia	2012	13	2863	ST-354 complex		S	<=2	R	>=4	R	32	S	<=0.5	S	0.25	S	<=1	R	>=16	2	KP794677	31809
97	02/35/10c	human	Slovenia	2010	11	905	UA		S	<=2	R	>=4	R	64	S	<=0.5	S	0.5	S	2	R	>=16	2	KP794683	31821
98	MRC-12/00190	human	Austria	2012	13	572	ST-206 complex		S	<=2	R	>=4	S	16	S	<=0.5	S	<=0.12	S	<=1	R	8	2	KP794784	31635
99	MRC-12/00284	human	Austria	2012	13	2275	ST-52 complex		S	<=2	R	>=4	R	64	S	1	S	0.5	S	<=1	R	8	2	KP794786	31645
100	MRC-12/00289	human	Austria	2012	13	122	ST-206 complex		S	<=2	R	>=4	R	>=64	S	<=0.5	S	0.25	S	<=1	R	>=16	2	KP794785	31632
101	MRC-12/00298	human	Austria	2012	13	122	ST-206 complex		S	<=2	R	>=4	R	>=64	S	4	S	1	S	<=1	R	16	2	KP794787	31633
102	9090	human	Slovenia	2009	1	50	ST-21 complex		S	<=2	R	>=4	R	>=64	S	<=0.5	S	<=0.12	S	<=1	R	>=16	2	KP794654	29951
103	MRC-11/00030	human	Austria	2011	1	50	ST-21 complex		S	<=2	R	>=4	R	32	S	<=0.5	S	<=0.12	S	<=1	R	8	2	KP794776	31639
104	MRC-13/00001	human	Austria	2013	13	257	ST-257 complex		S	<=2	R	4	S	8	S	<=0.5	S	<=0.12	S	<=1	R	2	2	KP794761	31641
105	9711	human	Slovenia	2009	1	50	ST-21 complex		S	<=2	R	>=4	R	>=64	S	<=0.5	S	0.25	S	2	R	>=16	2	KP794660	29959
106	MRC-13/00006	human	Austria	2013	2	2361	ST-443 complex		S	<=2	R	>=4	R	>=64	S	<=0.5	S	0.5	S	<=1	R	>=16	2	KP794760	31640
107	MRC-13/00028	human	Austria	2013	13	492	ST-48 complex		S	<=2	R	>=4	R	64	S	1	S	0.25	S	<=1	R	>=16	2	KP794762	31634
108	MRC-09/00020	human	Austria	2009	1	21	ST-21 complex		S	<=2	R	>=4	S	4	S	1	S	1	S	<=1	R	>=16	2	KP794746	31630
109	MRC-09/00028	human	Austria	2009	1	50	ST-21 complex		S	<=2	R	>=4	R	>=64	S	2	S	0.5	S	2	R	>=16	2	KP794748	31629
110	MRC-09/00033	human	Austria	2009	13	50	ST-21 complex		S	<=2	R	>=4	R	>=64	S	<=0.5	S	<=0.12	S	2	R	>=16	2	KP794749	31631
111	MRC-10/00019	human	Austria	2010	1	883	ST-21 complex		S	<=2	R	>=4	R	>=64	S	1	S	0.25	S	<=1	R	>=16	2	KP794793	31638
112	MRC-10/00032	human	Austria	2010	1	354	ST-354 complex		S	<=2	R	>=4	R	64	S	<=0.5	S	<=0.12	S	<=1	R	16	2	KP794794	31642
113	MRC-10/00033	human	Austria	2010	1	50	ST-21 complex		S	<=2	R	>=4	R	>=64	S	<=0.5	S	0.25	S	<=1	R	16	2	KP794795	31637
114	BfR-CA-06894	duck meat	Germany	2008	4	45	ST-45 complex		S	<=2	R	>=4	R	64	S	1	S	0.5	S	2	R	>=16	2	KP794693	31688
115	BfR-CA-07731	cow milk	Germany	2009	1	21	ST-21 complex		S	<=2	R	>=4	R	64	S	1	S	0.5	S	<=1	R	16	2	KP794698	31655
116	BfR-CA-07732	cow milk	Germany	2009	1	21	ST-21 complex		S	<=2	R	2	R	32	S	1	S	<=0.12	S	<=1	R	8	2	KP794699	31656
117	BfR-CA-07874	cow milk	Germany	2009	1	5403	ST-21 complex		S	<=2	R	>=4	R	32	S	<=0.5	S	<=0.12	S	<=1	R	>=16	2	KP794700	31658
118	1190/09	chicken skin	Slovenia	2009	1	50	ST-21 complex		S	<=2	R	>=4	R	>=64	S	<=0.5	S	0.25	S	<=1	R	>=16	2	KP794632	29916
119	BfR-CA-11327	chicken skin	Germany	2013	13	48	ST-48 complex		S	<=2	R	>=4	R	64	S	<=0.5	S	0.5	S	2	R	>=16	2	KP794713	31673
120	53124	chicken meat	Slovenia	2009	4	45	ST-45 complex		S	<=2	R	>=4	R	>=64	S	<=0.5	S	0.5	S	2	R	>=16	2	KP794644	29935
121	57360	chicken meat	Slovenia	2009	1	50	ST-21 complex		S	<=2	R	>=4	R	>=64	S	<=0.5	S	0.5	S	<=1	R	>=16	2	KP794647	29939
122	BfR-CA-07507	chicken meat	Germany	2009	1	50	ST-21 complex		S	<=2	R	>=4	R	>=64	S	<=0.5	S	0.5	S	2	R	4	2	KP794697	31681
123	60089	chicken meat	Slovenia	2009	1	50	ST-21 complex		S	<=2	R	>=4	R	>=64	S	<=0.5	S	0.5	S	<=1	R	>=16	2	KP794649	29942
124	61035	chicken meat	Slovenia	2009	13	2863	ST-354 complex		S	<=2	R	>=4	S	2	S	<=0.5	S	0.25	S	2	R	16	2	KP794651	29944
125	IVZ1371	chicken meat	Slovenia	2012	13	2863	ST-354 complex		S	≤ 2	R	>= 4	S	≤ 2	S	<=0.5	S	<=0.12	S	<=1	R	>=16	2	KP794740	31711
126	MRC-11/00711	chicken faeces	Austria	2011	13	305	ST-574 complex		S	<=2	R	>=4	R	>=64	S	1	S	0.5	S	<=1	R	>=16	2	KP794805	34200
127	MRC-13/02068	chicken faeces	Austria	2013	13	2274	UA		S	<=2	R	>=4	R	64	S	1	S	0.25	S	<=1	R	16	2	KP794773	31612
128	MRC-11/00900	chicken faeces	Austria	2011	13	449	UA		S	4	R	>=4	R	>=64	S	1	S	0.5	S	2	R	>=16	2	KP794791	31620
129	1518/08	chicken faeces	Slovenia	2008	1	50	ST-21 complex		S	<=2	R	>=4	R	>=64	S	<=0.5	S	0.25	S	<=1	R	>=16	2	KP794637	29925
130	4N	chicken faeces	Austria	UK	10	1707	ST-607 complex		S	<=2	R	4	S	4	S	<=0.5	S	<=0.12	S	<=1	R	2	2	KP794670	31621
131	846/09	chicken faeces	Slovenia	2009	5	572	ST-206 complex		S	<=2	R	>=4	R	>=64	S	<=0.5	S	0.25	S	<=1	R	>=16	2	KP794653	29948
132	MRC-12/02552	chicken faeces	Austria	2012	13	7054	ST-354 complex		S	<=2	R	>=4	R	>=64	S	<=0.5	S	0.25	S	2	R	>=16	2	KP794781	31614
133	MRC-12/03095	chicken faeces	Austria	2012	13	7517	ST-443 complex	glyA 599, ST 7517	S	<=2	R	>=4	R	>=64	S	<=0.5	S	<=0.12	S	<=1	R	>=16	2	KP794783	32370
134	965/09	chicken faeces	Slovenia	2009	13	2863	ST-354 complex		S	<=2	R	>=4	R	>=64	S	<=0.5	S	0.5	S	<=1	R	>=16	2	KP794659	29958
135	MRC-12/02291	chicken faeces	Austria	2012	1	464	ST-464 complex		S	<=2	R	>=4	R	64	S	<=0.5	S	0.25	S	<=1	R	>=16	2	KP794780	31618
136	MRC-09/00063	chicken faeces	Austria	2009	13	4370	ST-353 complex		S	<=2	R	>=4	S	16	S	<=0.5	S	0.25	S	<=1	R	16	2	KP794757	31615
137	MRC-09/00239	chicken faeces	Austria	2009	1	50	ST-21 complex		S	<=2	R	>=4	R	64	S	<=0.5	S	0.25	S	<=1	R	>=16	2	KP794758	31608
138	MRC-09/00280	chicken faeces	Austria	2009	6	492	ST-48 complex		S	<=2	R	>=4	R	>=64	S	<=0.5	S	0.5	S	<=1	R	>=16	2	KP794759	31609
139	MRC-10/00129	chicken faeces	Austria	2010	1	6209	ST-464 complex		S	<=2	R	>=4	R	64	S	<=0.5	S	0.25	S	<=1	R	16	2	KP794768	31619
140	MRC-10/00396-2	chicken faeces	Austria	2010	13	2274	UA		S	<=2	R	>=4	R	>=64	S	<=0.5	S	<=0.12	S	<=1	R	16	2	KP794764	31611
141	MRC-13/01900	chicken faeces	Austria	2013	13	4370	ST-353 complex		S	<=2	R	>=4	S	16	S	<=0.5	S	<=0.12	S	<=1	R	8	2	KP794772	31616
142	MRC-10/00488	chicken faeces	Austria	2010	13	51	ST-443 complex		S	<=2	R	>=4	R	>=64	S	<=0.5	S	<=0.12	S	<=1	R	4	2	KP794766	31610
143	MRC-10/00517	chicken faeces	Austria	2010	13	2274	UA		S	<=2	R	4	S	16	S	<=0.5	S	<=0.12	S	<=1	R	8	2	KP794767	31607
144	9N	chicken faeces	Austria	UK	1	464	ST-464 complex		S	<=2	R	>=4	R	>= 64	S	<=0.5	S	<=0.12	S	<=1	R	>=16	2	KP794671	31622
145	BfR-CA-10104	chicken caecum	Germany	2012	14	4819	UA		S	4	R	>=4	R	64	S	<=0.5	S	0.5	S	<=1	R	>=16	2	KP794703	31669
146	BfR-CA-11641	chicken caecum	Germany	2013	15	6178	ST-1034 complex		S	4	R	>=4	R	>=64	S	<=0.5	S	0.5	S	<=1	R	>=16	2	KP794720	31670
147	BfR-CA-10767	cafl faeces	Germany	2012	1	19	ST-21 complex		S	<=2	R	>=4	R	>=64	S	2	S	1	S	2	R	>=16	2	KP794707	31663
148	MRC-11/00179	bovine faeces	Austria	2011	1	883	ST-21 complex		S	<=2	R	>=4	R	32	S	<=0.5	S	<=0.12	S	<=1	R	16	2	KP794788	31592
149	MRC-11/00224	bovine faeces	Austria	2011	6	50	ST-21 complex		S	<=2	R	>=4	R	>=64	S	<=0.5	S	0.5	S	2	R	>=16	2	KP794789	31602
150	MRC-11/00289	bovine faeces	Austria	2011	1	21	ST-21 complex		S	<=2	R	>=4	R	>=64	S	<=0.5	S	0.25	S	<=1	R	8	2	KP794790	31595
151	MRC-11/01076	bovine faeces	Austria	2011	1	21	ST-21 complex		S	<=2	R	>=4	R	64	S	<=0.5	S	0.5	S	<=1	R	4	2	KP794792	31591
152	MRC-11/01225	bovine faeces	Austria	2011	1	1519	ST-21 complex		S	8	R	>=4	R	>=64	S	2	S	0.25	S	<=1	R	>=16	2	KP794778	31599
153	08/000314	bovine faeces	Austria	2008	1	21	ST-21 complex		S	<=2	R	>=4	R	64	S	1	S	0.25	S	<=1	R	16	2	KP794755	31593
154	08/000367	bovine faeces	Austria	2008	6	50	ST-21 complex		S	<=2	R	>=4	R	64	S	<=0.5	S	<=0.12	S	<=1	R	>=16	2	KP794756	31600
155	08/000368	bovine faeces	Austria	2008	13	305	ST-574 complex		S	<=2	R	>=4	R	64	S	<=0.5	S	0.25	S	<=1	R	>=16	2	KP794750	31596
156	08/000426	bovine faeces	Austria	2008	13	305	ST-574 complex		S	<=2	R	>=4	R	32	S	<=0.5	S	<=0.12	S	<=1	R	>=16	2	KP794751	31605
157	08/000446	bovine faeces	Austria	2008	1	50	ST-21 complex		S	<=2	R	>=4	R	>=64	S	1	S	0.25	S	<=1	R	>=16	2	KP794752	31597
158	BfR-CA-11317	bovine faeces	Germany	2013	1	577	ST-21 complex		S	<=2	R	>=4	R	32	S	<=0.5	S	0.5	S	<=1	R	>=16	2	KP794712	31649
159	08/000256	bovine faeces	Austria	2008	1	50	ST-21 complex		ND	ND	R	>=4	R	>=64	S	<=0.5	S	0.25	ND	ND	R	>=16	ND	KP794754	31598
160	BfR-CA-11386	bovine faeces	Germany	2013	8	861	ST-21 complex		S	<=2	R	>=4	R	64	S	1	S	0.25	S	2	R	>=16	2	KP794715	31650
161	BfR-CA-11627	bovine faeces	Germany	2013	1	21	ST-21 complex		S	<=2	R	>=4	R	32	S	1	S	0.25	S	2	R	>=16	2	KP794719	31648
162	MRC-10/00192	bovine faeces	Austria	2010	13	257	ST-257 complex		S	<=2	R	>=4	S	16	S	<=0.5	S	<=0.12	S	<=1	R	4	2	KP794770	31604
163	MRC-11/01596	bovine faeces	Austria	2011	1	21	ST-21 complex		S	<=2	R	>=4	R	64	ND	ND	S	0.5	S	<=1	R	16	ND	KP794779	31594
164	MRC-10/00374	bovine faeces	Austria	2010	6	50	ST-21 complex		S	<=2	R	>=4	R	>=64	S	<=0.5	S	0.25	S	<=1	R	>=16	2	KP794771	31601
165	MRC-10/00487	bovine faeces	Austria	2010	1	7506	ST-464 complex	ST 7506	S	<=2	R	>=4	R	64	S	<=0.5	S	<=0.12	S	<=1	R	16	2	KP794765	31590
166	08/000505	bovine faeces	Austria	2008	1	464	ST-464 complex		S	<=2	R	>=4	R	>=64	S	<=0.5	ND	ND	S	<=1	R	>=16	ND	KP794753	31606
167	49659	human	Slovenia	2009	1	267	ST-283 complex		S	<=2	R	>=4	R	>=64	R	>=32	S	0.5	R	>=16	S	<=0.25	3	KP794688	34201
168	MRC-13/00067	human	Austria	2013	13	4370	ST-353 complex		S	<=2	R	>=4	R	>=64	S	1	S	0.25	R	>=16	R	>=16	3	KP794763	31644
169	C33	chicken meat	Bosnia and Herzegovina	UK	13	400	ST-353 complex		S	<=2	R	>=4	R	32	S	1	S	0.25	R	>=16	R	>=16	3	KP794664	31646
170	MRC-12/02553	chicken faeces	Austria	2012	13	4370	ST-353 complex		S	4	R	>=4	R	>=64	S	1	S	0.25	R	>=16	R	>=16	3	KP794782	31617
171	MRC-13/02189	chicken faeces	Austria	2013	13	2274	UA		S	<=2	R	>=4	R	32	S	<=0.5	S	<=0.12	R	>=16	R	>=16	3	KP794774	31613
172	BfR-CA-10246	calf faeces	Germany	2012	13	21	ST-21 complex		S	4	R	>=4	R	>=64	S	2	S	1	R	8	R	>=16	3	KP794704	31662
173	BfR-CA-11348	bovine faeces	Germany	2013	1	21	ST-21 complex		S	<=2	R	>=4	R	64	S	1	S	0.25	R	>=16	R	>=16	3	KP794714	31647
174	158	chicken meat	Slovenia	2001	13	5208	ST-828 complex		S	<=2	R	>=4	R	>=64	R	>=32	S	0.5	R	>=16	R	>=16	4	KP794638	11224
175	MRC-10/00171	bovine faeces	Austria	2010	13	51	ST-443 complex		ND	ND	R	>=4	R	>=64	S	1	ND	ND	S	<=1	S	1	ND	KP794769	31603
176	58429	chicken meat	Slovenia	2009	1	50	ST-21 complex		S	<=2	R	>=4	R	>=64	R	>=32	S	0.5	R	>=16	R	>=16	4	KP794648	29940
177	C2	chicken meat	Serbia	UK	13	1707	ST-607 complex		S	16	R	>=4	R	>=64	R	>=32	S	0.5	R	>=16	R	>=16	4	KP794663	31699
178	IVZ958	chicken meat	Slovenia	2013	1	50	ST-21 complex		R	>=32	R	>=4	R	>=64	R	>=32	S	1	R	>=16	R	>=16	5	KP794739	31727
																																			7	17	5	2	10	461	6	5205	ST-353	complex
																																			295	7	10	4	1	7	1	5206	ST-45	complex
																																			37	187	4	28	19	24	23	5207

## Sheet: Breakpoints
Table 4. ECOFFs used to interpret MIC distributions (mg/L) for bacteria from animals and food – the given values define the ‘microbiologically’ resistant isolates
Antimicrobial agent	Salmonella	E. coli	E. faecium	E. faecalis	C. jejuni	C. coli
	mg/L	mg/L	mg/L	mg/L	mg/L	mg/L
Ampicillin	>8	>8	>4	>4
Apramycin	>16	>16
Avilamycin			>16	>8
Cefotaxime	>0.5	>0.25
Ceftazidime	>2	>0.5
Ceftiofur	>2	>1
Chloramphenicol	>16	>16	>32	>32	>16	>16
Ciprofloxacin	>0.064	>0.064	>4	>4	>0.5	>0.5
Erythromycin			>4	>4	>4	>8
Florfenicol	>16	>16
Gentamicin	>2	>2	>32	>32	>2	>2
Linezolid			>4	>4
Nalidixic acid	>16	>16			>16	>16
Neomycin	>4	>8
Spectinomycin		>64
Streptomycin	>32	>16	>128	>512	>4	>4
Sulfonamides	>256(a)	>64
Quinupristin/dalfopristin			>1
Tetracyclines	>8	>8	>4	>4	>1	>2
Trimethoprim	>2	>2
Vancomycin			>4	>4
ECOFFs: epidemiological cut-off values; MIC: minimum inhibitory concentration.
(a): Cut-off values were not defined by the European Committee on Antimicrobial Susceptibility Testing; instead cut-off values defined by the European Union Reference Laboratory on AMR (Technical University of Denmark) were used.
